# Supplementary material for: Structural and optical properties of in situ Eu-doped ZnCdO/ZnMgO superlattices grown by plasma-assisted molecular beam epitaxy
Source: Royal Society of Chemistry journal article supplement (doi:10.1039/d4nr04847d), 2025-01-01
Supplement: d4nr04847d1.pdf [file d4nr04847d1.pdf]

## Structural and optical properties of in situ Eu-doped ZnCdO/ZnMgO superlattices grown by plasma-assisted molecular beam epitaxy

Anastasiia Lysak,<sup>1</sup> Aleksandra Wierzbicka,<sup>1</sup> Sergio Magalhaes,<sup>2</sup> Piotr Dłużewski,<sup>1</sup> Rafał Jakiela,<sup>1</sup> Michał Szot,<sup>1,3</sup> Zeinab Khosravizadeh,<sup>1</sup> Abinash Adhikari,<sup>1</sup> Adrian Kozanecki<sup>1</sup> and Ewa Przeździecka\*<sup>1</sup>

1. Institute of Physics, Polish Academy of Sciences, al. Lotników 32/46, Warsaw, 02-668, Poland. E-mail: eilczuk@ifpan.edu.pl
2. IPFN, Instituto Superior Técnico, Universidade de Lisboa, Estrada Nacional 10, LRS, Bobadela, 2695-066, Portugal.
3. International Research Centre MagTop, Institute of Physics, Polish Academy of Sciences, Aleja Lotników 32/46, 02-668 Warsaw, Poland.

### Supplementary Materials

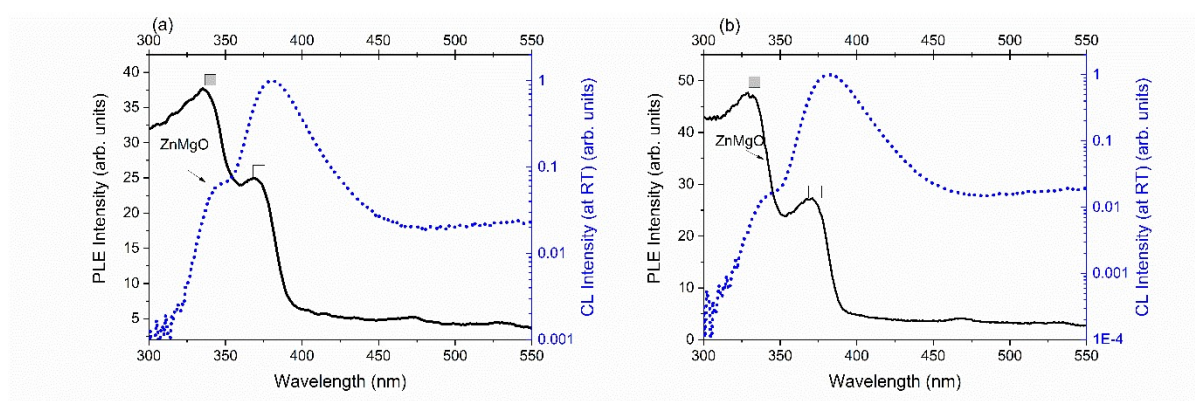

Fig S.1 PLE spectra (emission measured at 613 nm) and CL spectra measured at RT for two of the superlattices (a) sample A (b) sample B.

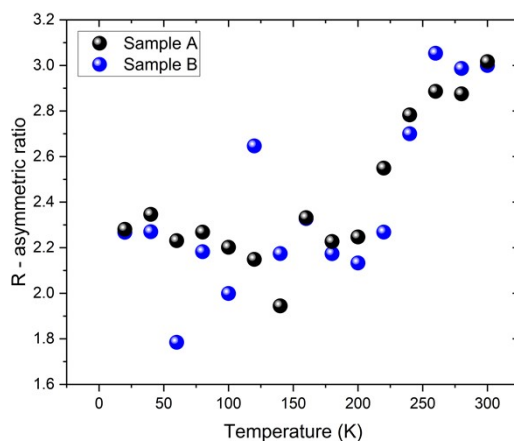

Fig S. 2 Dependence of luminescence integrated intensity ratio  $R$  on temperature of the  $I(^5D_0 \rightarrow ^7F_2)$  to  $I(^5D_0 \rightarrow ^7F_1)$  transition line.

---

Table S1. CIE coordinates of Eu-doped  $\{\text{ZnCdO}/\text{ZnMgO}\}_{22}$  SLs before and after annealing in an  $\text{O}_2$  for 1 minute at room temperature.

---

| Room temperature |           |       |       |
|------------------|-----------|-------|-------|
| Sample           |           | $x$   | $y$   |
| Sample A         | As-grown  | 0.3   | 0.275 |
|                  | RTP 700°C | 0.321 | 0.307 |
|                  | RTP 800°C | 0.242 | 0.195 |
|                  | RTP 900°C | 0.246 | 0.223 |
| Sample B         | As-grown  | 0.293 | 0.257 |
|                  | RTP 700°C | 0.34  | 0.313 |
|                  | RTP 800°C | 0.308 | 0.271 |
|                  | RTP 900°C | 0.267 | 0.246 |
